# Supplementary material for: Treatment Patterns, Clinical Outcomes and Healthcare Costs of Advanced Non-Small Cell Lung Cancer: A Real-World Evaluation in Italy
Source: MDPI journal article supplement (doi:10.3390/cancers13153809), 2021-07-29

**Tables S1.** ICD-9-CM codes of diagnosis/procedures, ATC codes of drugs and Regional codes of outpatients services used for the current study.

| Diagnosis (ICD-9-CM codes)                                      |                     |
|-----------------------------------------------------------------|---------------------|
| Lung cancer                                                     | 162* (except 162.0) |
| Chemotherapy                                                    | V58.1               |
| Procedures (ICD-9-CM codes)                                     |                     |
| Lung surgery                                                    |                     |
| Other local excision or destruction of lesion or tissue of lung | 32.29               |
| Segmental resection                                             | 32.3                |
| Lobectomy                                                       | 32.4                |
| Complete pneumonectomy                                          | 32.5                |
| Radical dissection of thoracic structures                       | 32.6                |
| Other excision of lung                                          | 32.9                |
| Chemotherapy/antineoplastic biological agents                   | 99.25, 99.28        |
| Drugs (ATC codes)                                               |                     |
| Immunotherapy                                                   |                     |
| Pembrolizumab                                                   | L01XC18             |
| Nivolumab                                                       | L01XC17             |
| Atezolizumab                                                    | L01XC32             |
| Tyrosine kinase inhibitors (TKI)                                |                     |
| Erlotinib                                                       | L01XE03             |
| Gefitinib                                                       | L01XE02             |
| Afatinib                                                        | L01XE13             |
| Osimertinib                                                     | L01EB04             |
| Crizotinib                                                      | L01ED01             |
| Alectinib                                                       | L01ED03             |
| Trametinib                                                      | L01EE01             |
| Dabrafenib                                                      | L01EC02             |
| Chemotherapy                                                    |                     |
| Cisplatin                                                       | L01XA01             |
| Carboplatin                                                     | L01XA02             |
| Docetaxel                                                       | L01CD02             |

|             |         |
|-------------|---------|
| Pemetrexed  | L01BA04 |
| Paclitaxel  | L01CD01 |
| Vinorelbine | L01CA04 |
| Gemcitabine | L01BC05 |

---

Outpatients service (Regional codes)

---

|                                                                       |       |
|-----------------------------------------------------------------------|-------|
| Chemotherapy with administration of high-cost drugs (file F 5 e 3)    | MAC01 |
| Chemotherapy without administration of high-cost drugs (file F 5 e 3) | MAC02 |
| Anticancer therapy with administration of oral drug or IM             | MAC04 |
| Injection or infusion of chemotherapy drugs                           | 99.25 |

---

**Tables S2.** Distribution of outpatient services dispensed to 660 advanced NSCLC patients treated with first-line pembrolizumab and to 1,245 patients treated with first-line TKI.

|                    | First-line treatment |       |
|--------------------|----------------------|-------|
|                    | Pembrolizumab        | TKI   |
| Laboratory exams   | 69.3%                | 71.8% |
| Diagnostic imaging | 10.5%                | 9.9%  |
| Specialist visits  | 8.9%                 | 8.9%  |
| Other              | 11.3%                | 9.5%  |

**Figure S1.** Flow-chart of cohort selection.

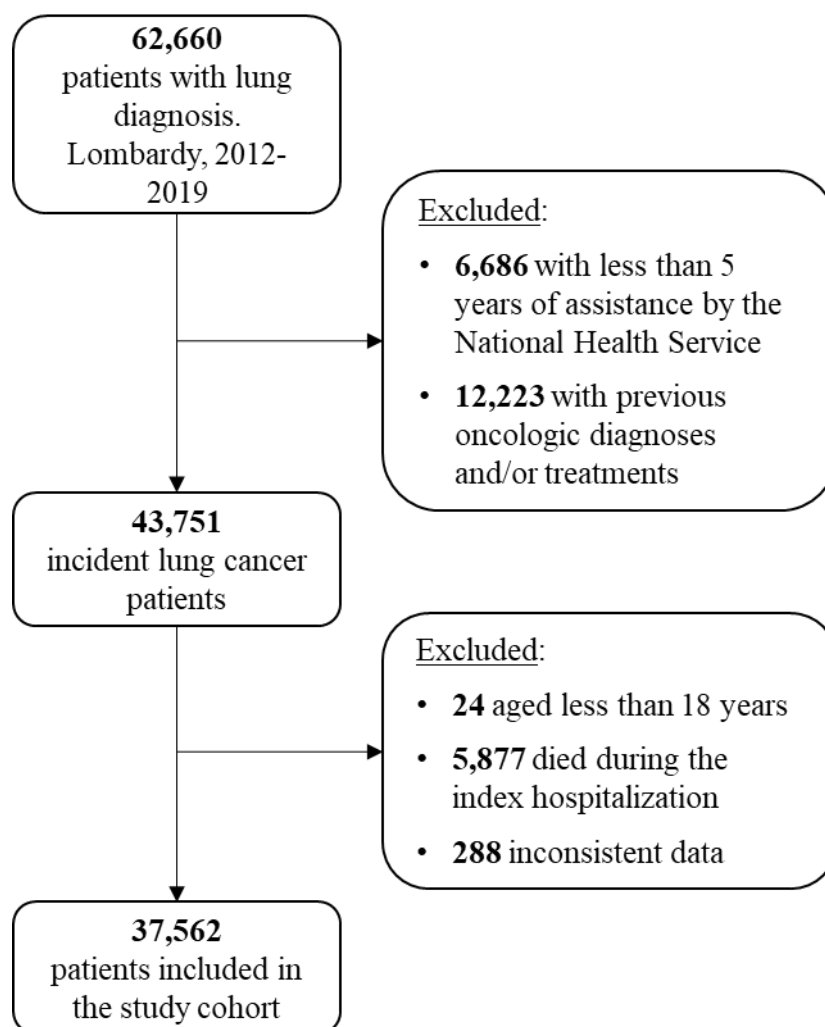

Supplement: s1 [file s1]
